# Supplementary material for: 2,4-Diamino-Quinazoline, a Wnt Signaling Inhibitor, Suppresses Gastric Cancer Progression and Metastasis
Source: PubMed Central journal article supplement (PMC7460562; doi:10.3390/ijms21165901), 2020-08-17
Supplement: ijms-21-05901-s001.pdf [file ijms-21-05901-s001.pdf]

## Supplementary Information

### Supplementary Figures

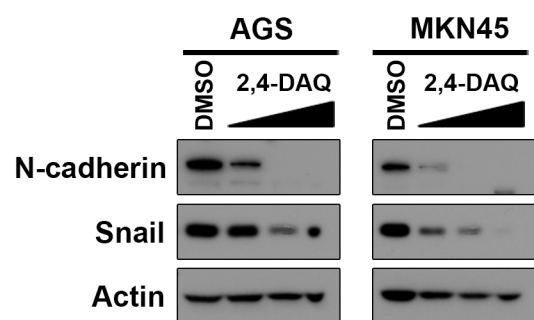

Figure S1. The expression of N-cadherin and snail is downregulated by 2,4-DAQ

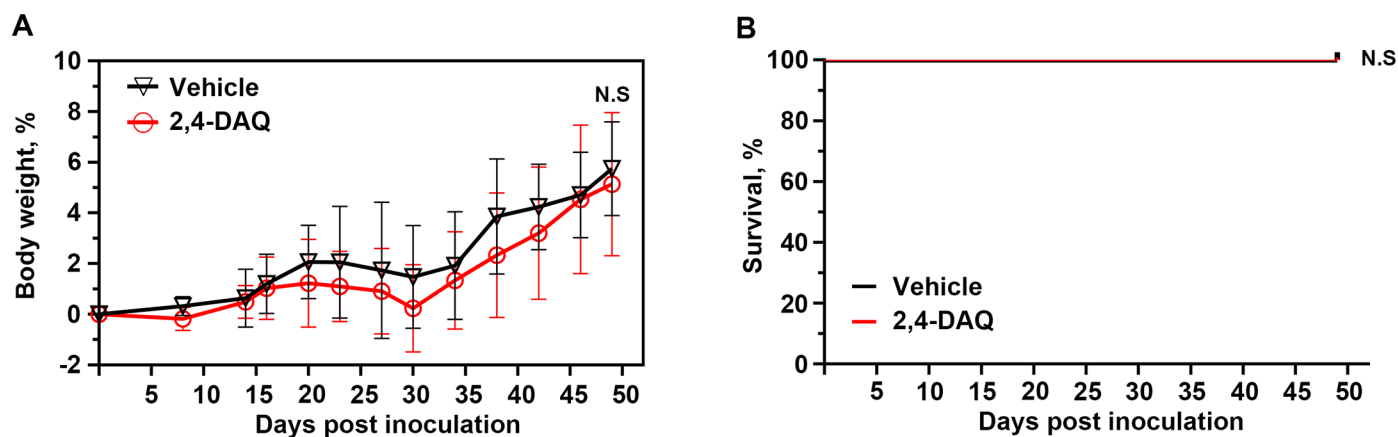

Figure S2. Effects of 2,4-DAQ on bodyweight change and survival rate in MKN45 xenograft nude mice.

(A) Bodyweight evaluation 2,4-DAQ vs. vehicle group. (B) Survival analysis by Log-rank test.

(N.S, not significant)

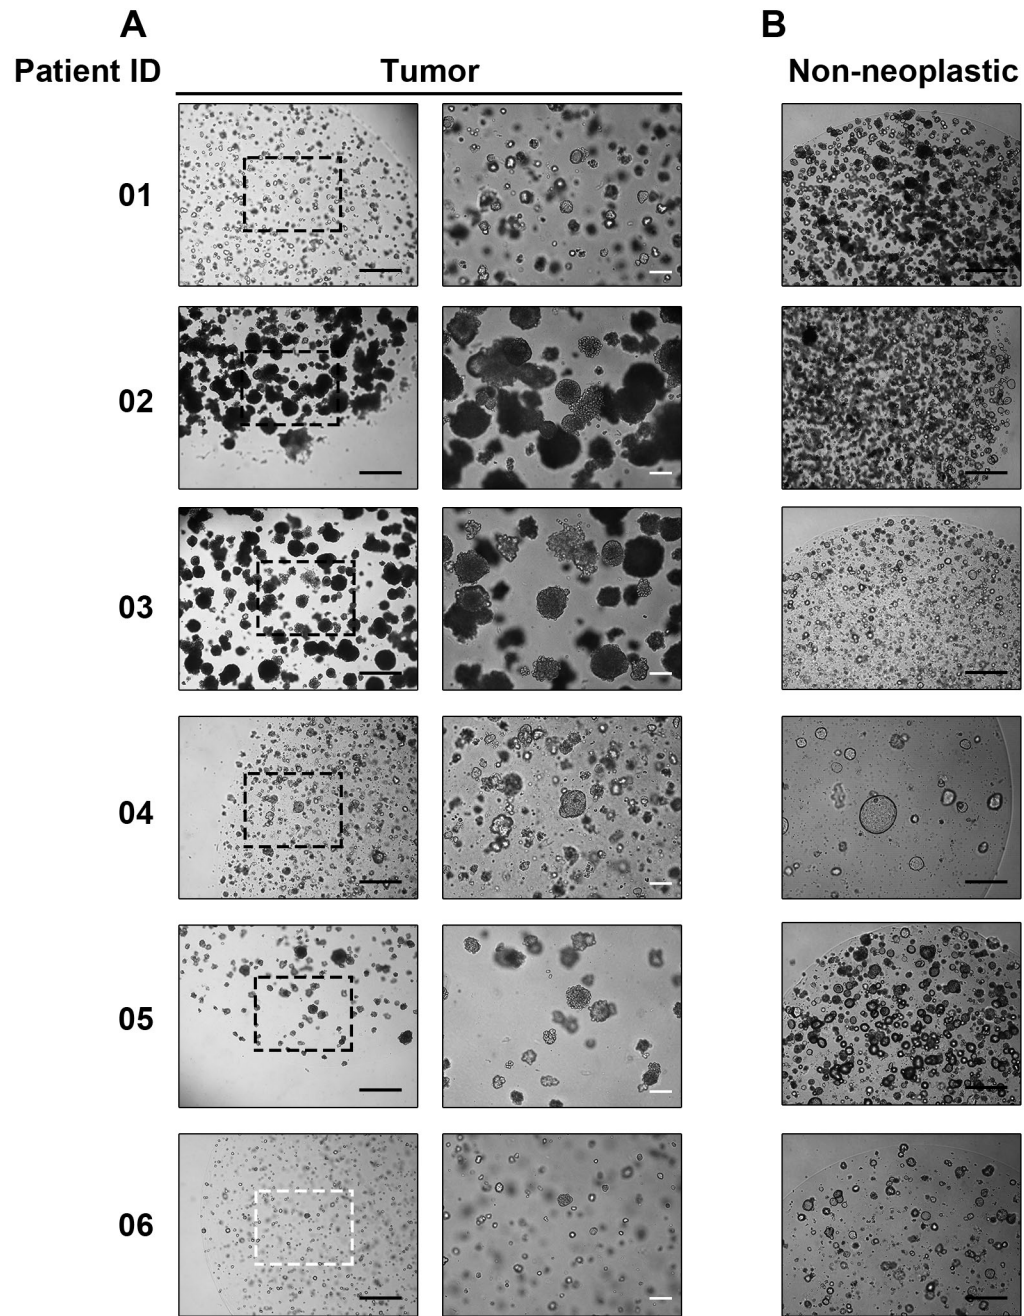

**Figure S3. Establishment of PDOs from GC.** Representative bright-field images of six (A) tumor-derived organoids and (B) non-neoplastic lesions-derived organoids. Black scale bars: 500  $\mu$ m, white scale bars: 100  $\mu$ m.

## Supplementary Tables

**Table S1. Summary of test compounds against Wnt signaling pathway**

| Compound                | Target                                           | Reference                       |
|-------------------------|--------------------------------------------------|---------------------------------|
| 2,4-diamino-quinazoline | $\beta$ -catenin and TCF-dependent transcription | Z Chen et al. (2009) [15]       |
| iCRT3                   | $\beta$ -catenin interaction with TCF7L2         | Bilir, et al. (2013) [S1]       |
| iCRT14                  | $\beta$ -catenin interaction with TCF7L2         | Bilir, et al. (2013) [S1]       |
| CCT031374 hydrobromide  | $\beta$ -catenin and TCF-dependent transcription | Ewan, et al. (2010) [S2]        |
| PKF118-310              | $\beta$ -catenin and TCF-dependent transcription | Lepourcelet, et al. (2004) [S3] |
| PKF115-584              | $\beta$ -catenin interaction with TCF7L2         | Doghman, et al. (2008) [S4]     |
| Adavivint               | Wnt pathway                                      | Yazici, et al. (2017) [S5]      |
| FH535                   | $\beta$ -catenin and TCF-dependent transcription | Handeli and Simon (2008) [S6]   |
| Quercetin (Flavonoids)  | $\beta$ -catenin and TCF-dependent transcription | Novo, et al. (2015) [S7]        |
| Curcumin (Polyphenols)  | Wnt pathway                                      | He, et al. (2014) [S8]          |

- S1 Bilir, B.; Kucuk, O.; Moreno, C. S., Wnt signaling blockage inhibits cell proliferation and migration, and induces apoptosis in triple-negative breast cancer cells. *J Transl Med* **2013**, 11, 280.
- S2 Ewan, K.; Pajak, B.; Stubbs, M.; Todd, H.; Barbeau, O.; Quevedo, C.; Botfield, H.; Young, R.; Ruddle, R.; Samuel, L.; Battersby, A.; Raynaud, F.; Allen, N.; Wilson, S.; Latinkic, B.; Workman, P.; McDonald, E.; Blagg, J.; Aherne, W.; Dale, T., A useful approach to identify novel small-molecule inhibitors of Wnt-dependent transcription. *Cancer Res* **2010**, 70, (14), 5963-73.
- S3 Lepourcelet, M.; Chen, Y.-N. P.; France, D. S.; Wang, H.; Crews, P.; Petersen, F.; Bruseo, C.; Wood, A. W.; Shivdasani, R. A., Small-molecule antagonists of the oncogenic Tcf/ $\beta$ -catenin protein complex. *Cancer Cell* **2004**, 5, (1), 91-102.
- S4 Doghman, M.; Cazareth, J.; Lalli, E., The T cell factor/ $\beta$ -catenin antagonist PKF115-584 inhibits proliferation of adrenocortical carcinoma cells. *J Clin Endocrinol Metab* **2008**, 93, (8), 3222-5.
- S5 Yazici, Y.; McAlindon, T. E.; Fleischmann, R.; Gibofsky, A.; Lane, N. E.; Kivitz, A. J.; Skrepnik, N.; Armas, E.; Swearingen, C. J.; DiFrancesco, A.; Tambiah, J. R. S.; Hood, J.; Hochberg, M. C., A novel Wnt pathway inhibitor, SM04690, for the treatment of moderate to severe osteoarthritis of the knee: results of a 24-week, randomized, controlled, phase 1 study. *Osteoarthritis Cartilage* **2017**, 25, (10), 1598-1606.
- S6 Handeli, S.; Simon, J. A., A small-molecule inhibitor of Tcf/ $\beta$ -catenin signaling down-regulates PPAR $\gamma$  and PPAR $\delta$  activities. *Mol Cancer Ther* **2008**, 7, (3), 521-9.
- S7 Novo, M. C.; Osgui, L.; dos Reis, V. O.; Longo-Maugeri, I. M.; Mariano, M.; Popi, A. F., Blockage of Wnt/ $\beta$ -catenin signaling by quercetin reduces survival and proliferation of B-1 cells in vitro. *Immunobiology* **2015**, 220, (1), 60-7.
- S8 He, M.; Li, Y.; Zhang, L.; Li, L.; Shen, Y.; Lin, L.; Zheng, W.; Chen, L.; Bian, X.; Ng, H. K.; Tang, L., Curcumin suppresses cell proliferation through inhibition of the Wnt/ $\beta$ -catenin signaling pathway in medulloblastoma. *Oncol Rep* **2014**, 32, (1), 173-80.

**Table S2. Clinical information for GC PDOs**

| Patient ID | Age | Gender | Histologic Type (Lauren) | Histologic Grade          | Pathologic Stage |                      |
|------------|-----|--------|--------------------------|---------------------------|------------------|----------------------|
|            |     |        |                          |                           | pTNM             | AJCC 8 <sup>th</sup> |
| 01         | 89  | ♀      | Intestinal type          | Moderately differentiated | pT2N1M0          | IIA                  |
| 02         | 69  | ♀      | Diffuse type             | Poorly differentiated     | pT1aN0M0         | IA                   |
| 03         | 57  | ♀      | Diffuse type             | Poorly differentiated     | pT1bN0M0         | IA                   |
| 04         | 67  | ♀      | Diffuse type             | Poorly differentiated     | pT3N1M0          | IIB                  |
| 05         | 84  | ♂      | Intestinal type          | Moderately differentiated | pT3N2M0          | IIIA                 |
| 06         | 61  | ♂      | Mixed type               | Poorly differentiated     | pT4aN3aM0        | IIIB                 |
